# Supplementary material
Source: PubMed Central journal article supplement (PMC5474951)
Supplement: NIHMS865093-supplement-1.pdf [file NIHMS865093-supplement-1.pdf]

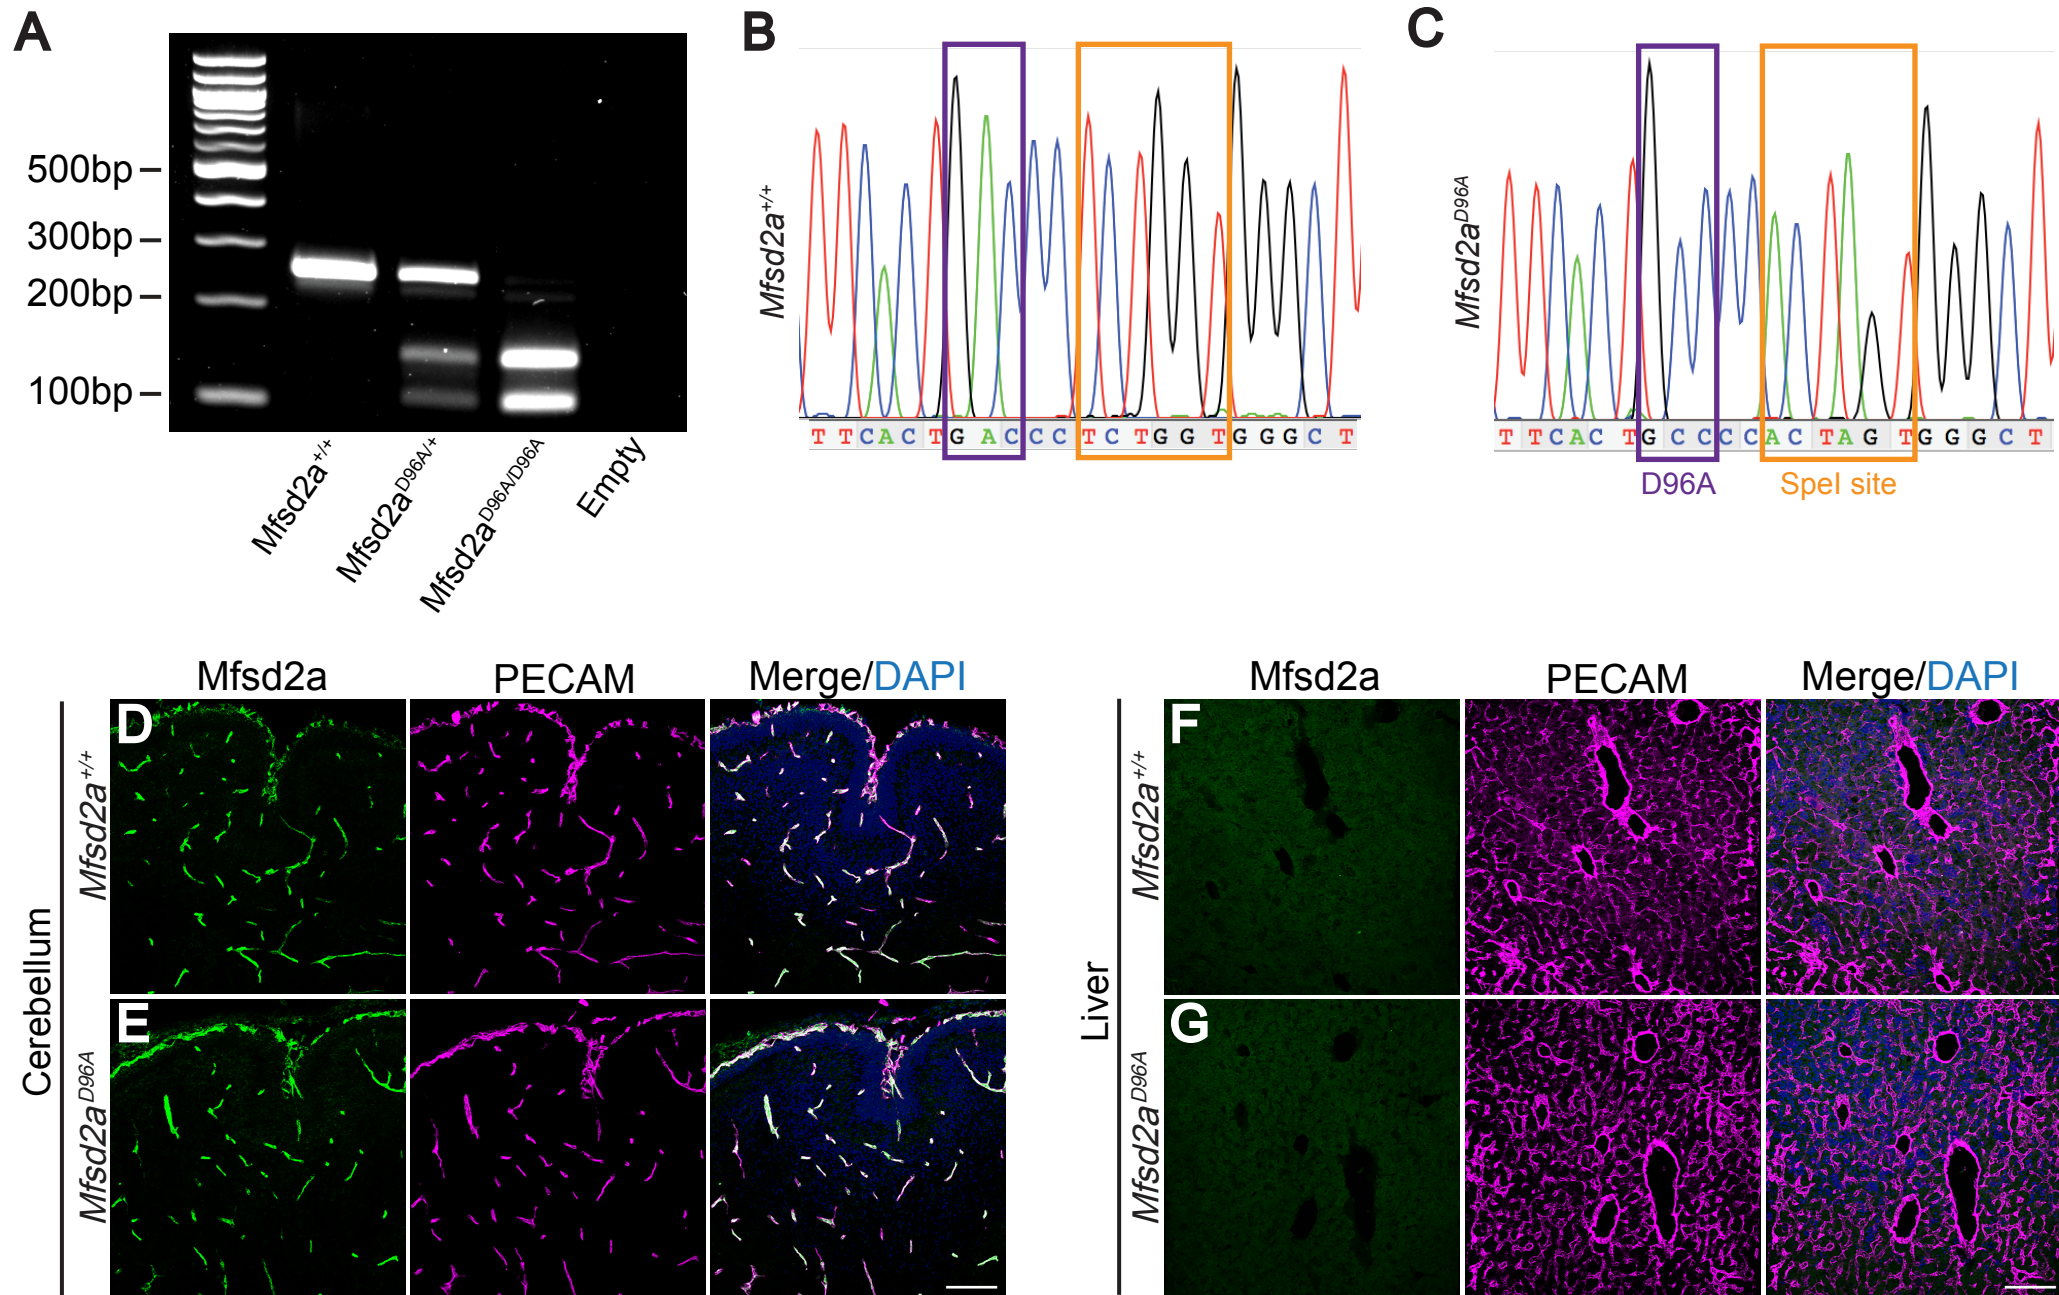

**Figure S1**

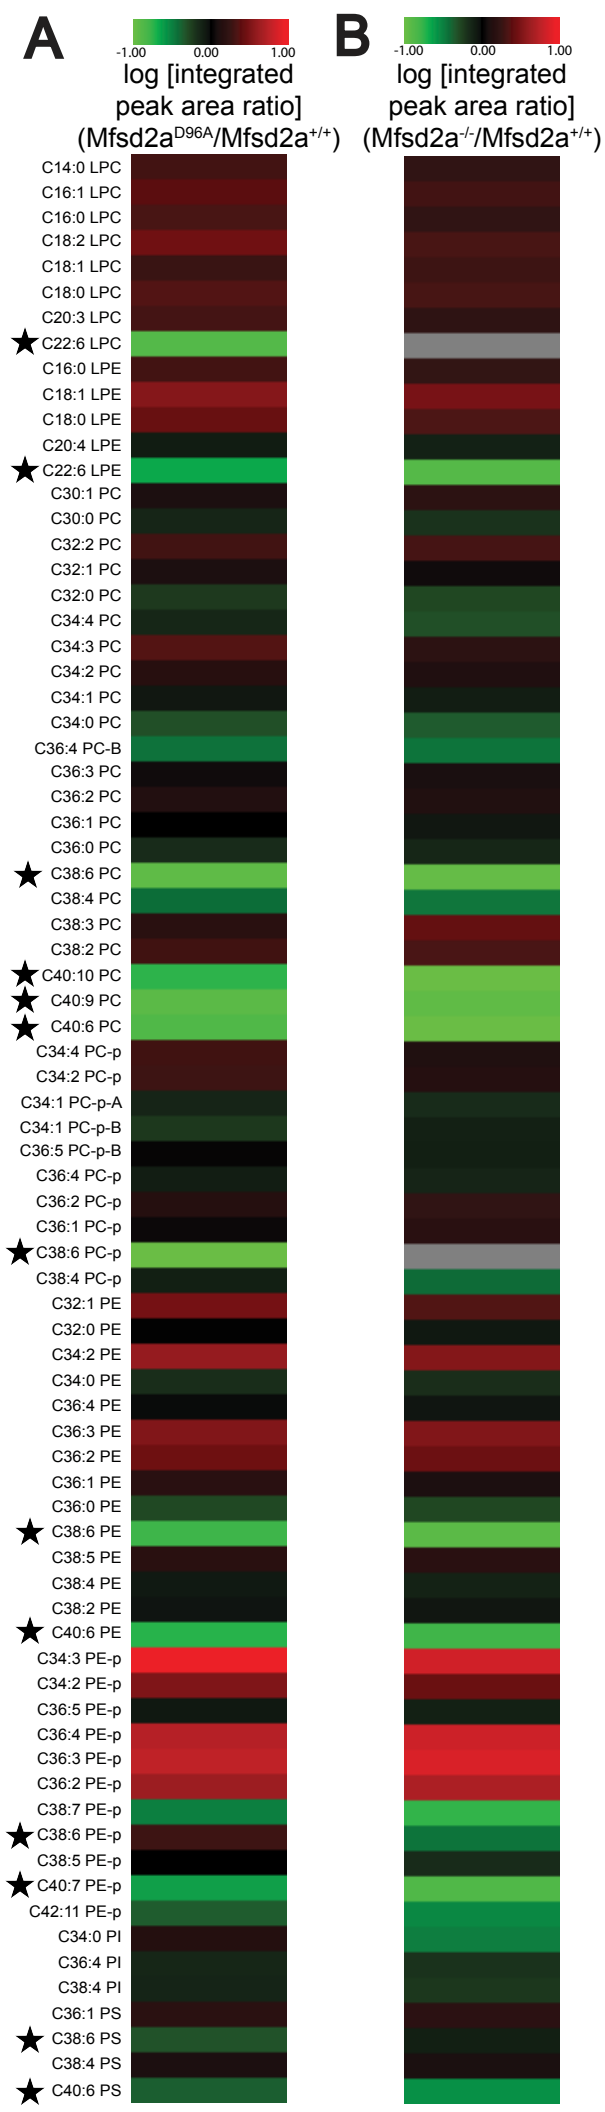

★: DHA-containing phospholipid



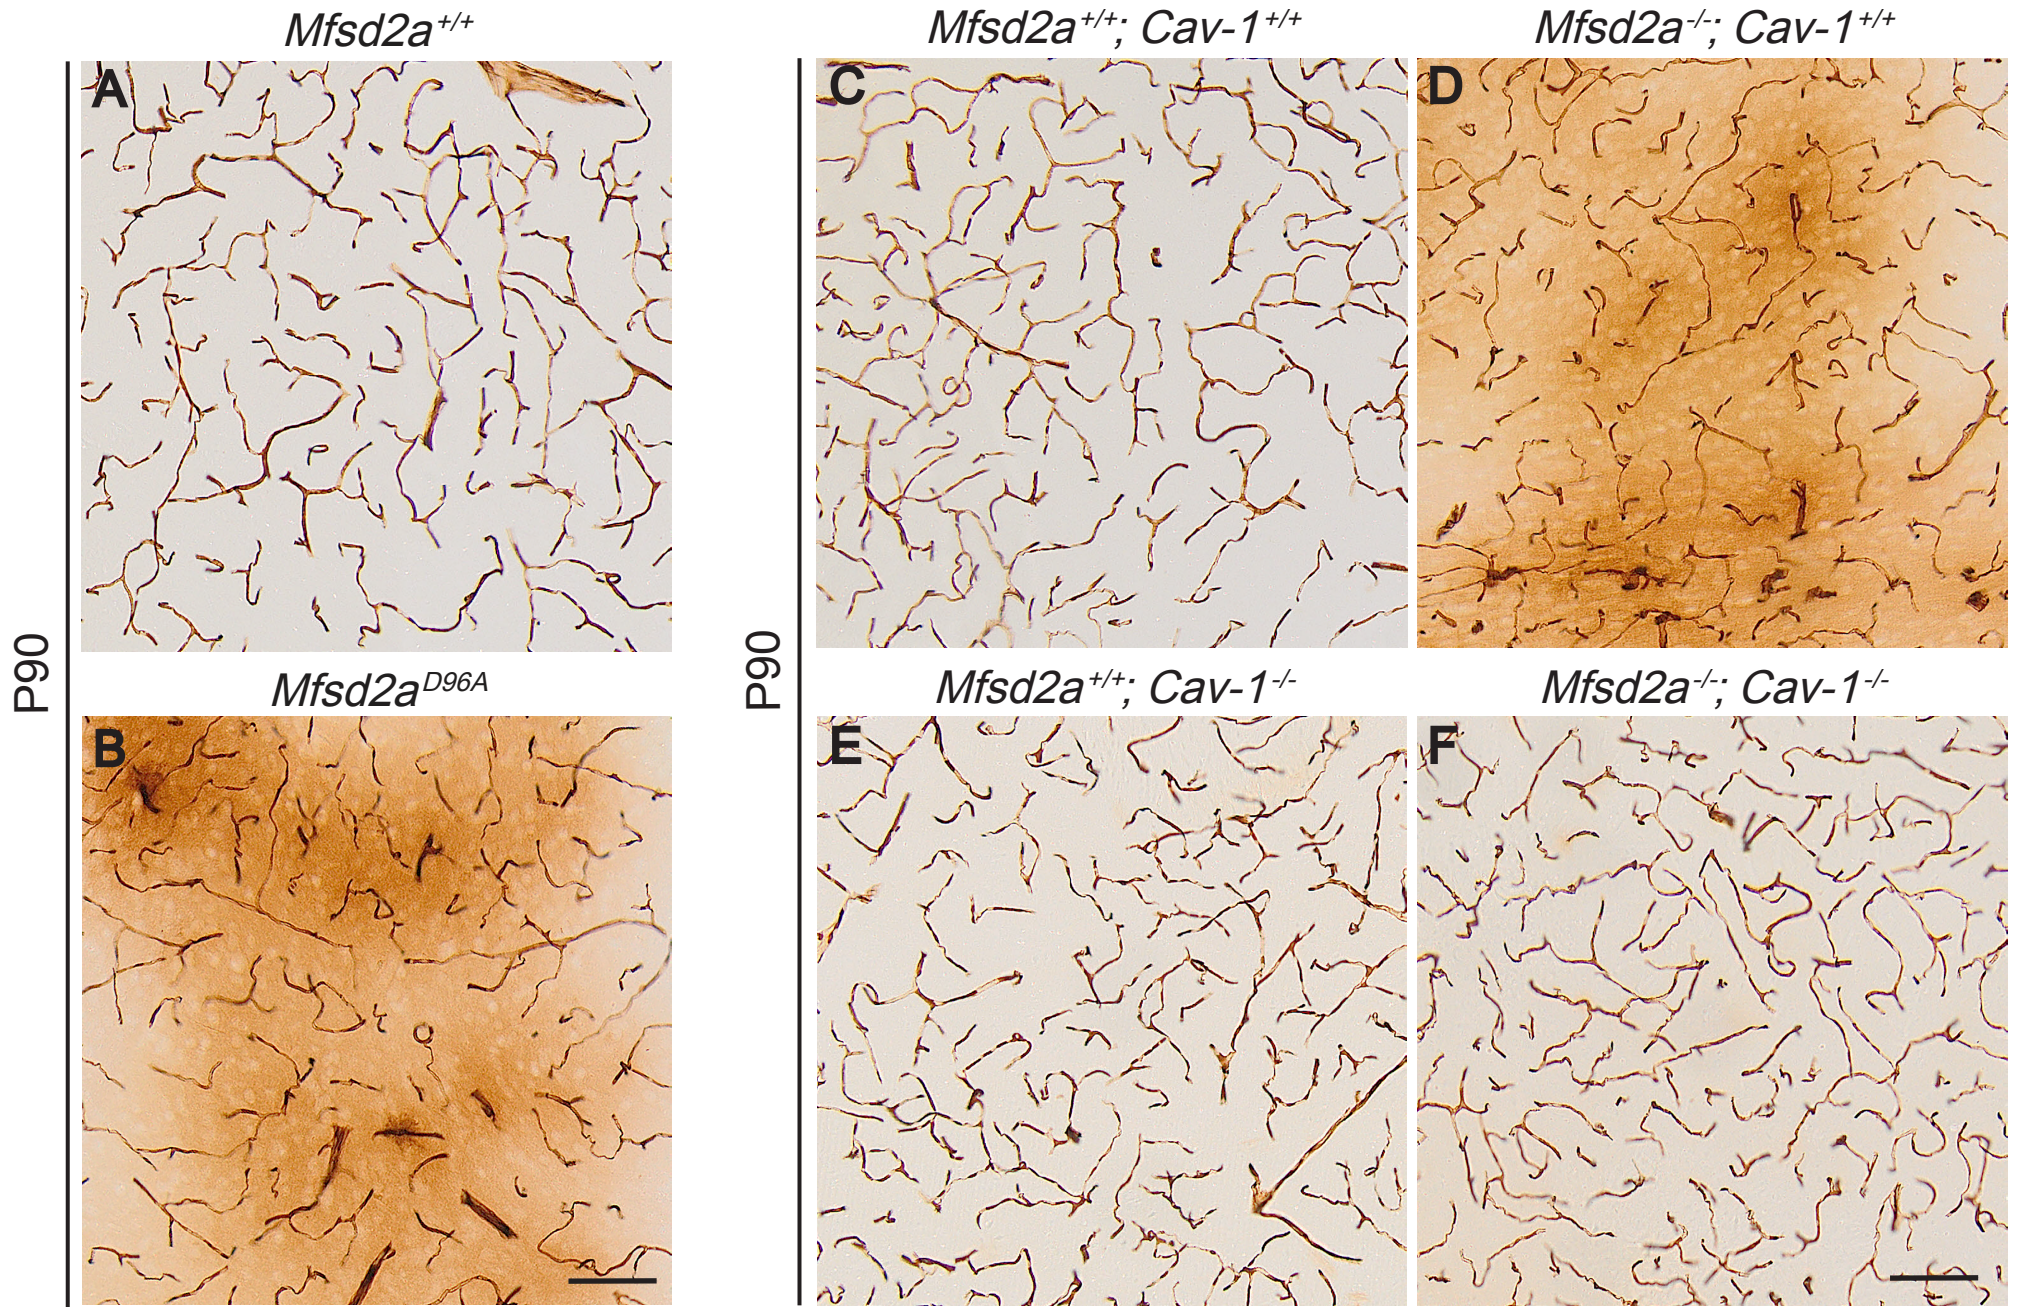

**Figure S3**



A

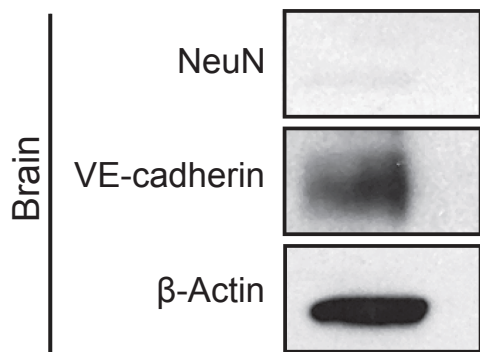

B

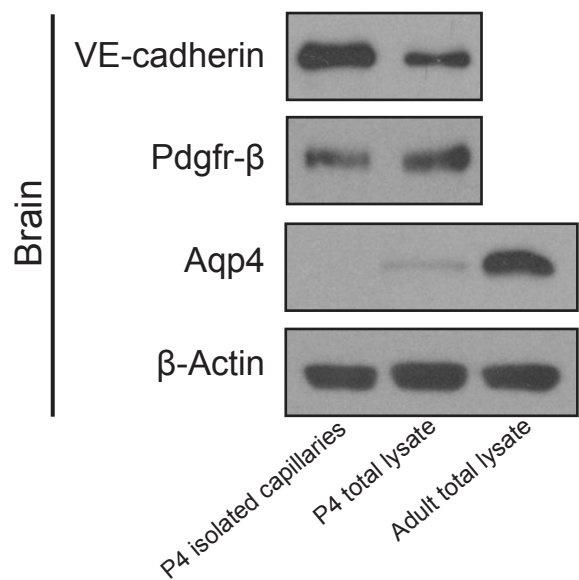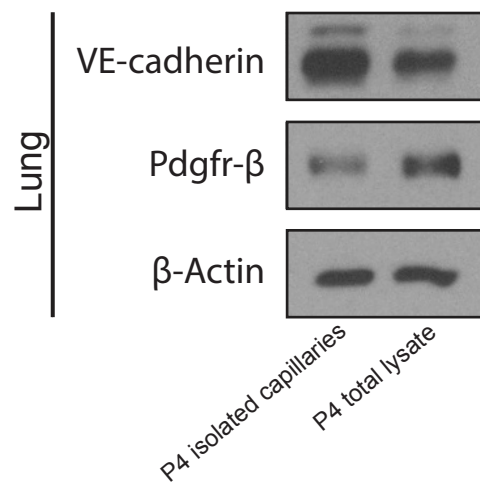

C

log [integrated peak area ratio]  
(brain/lung)

-1.00 0.00 1.00

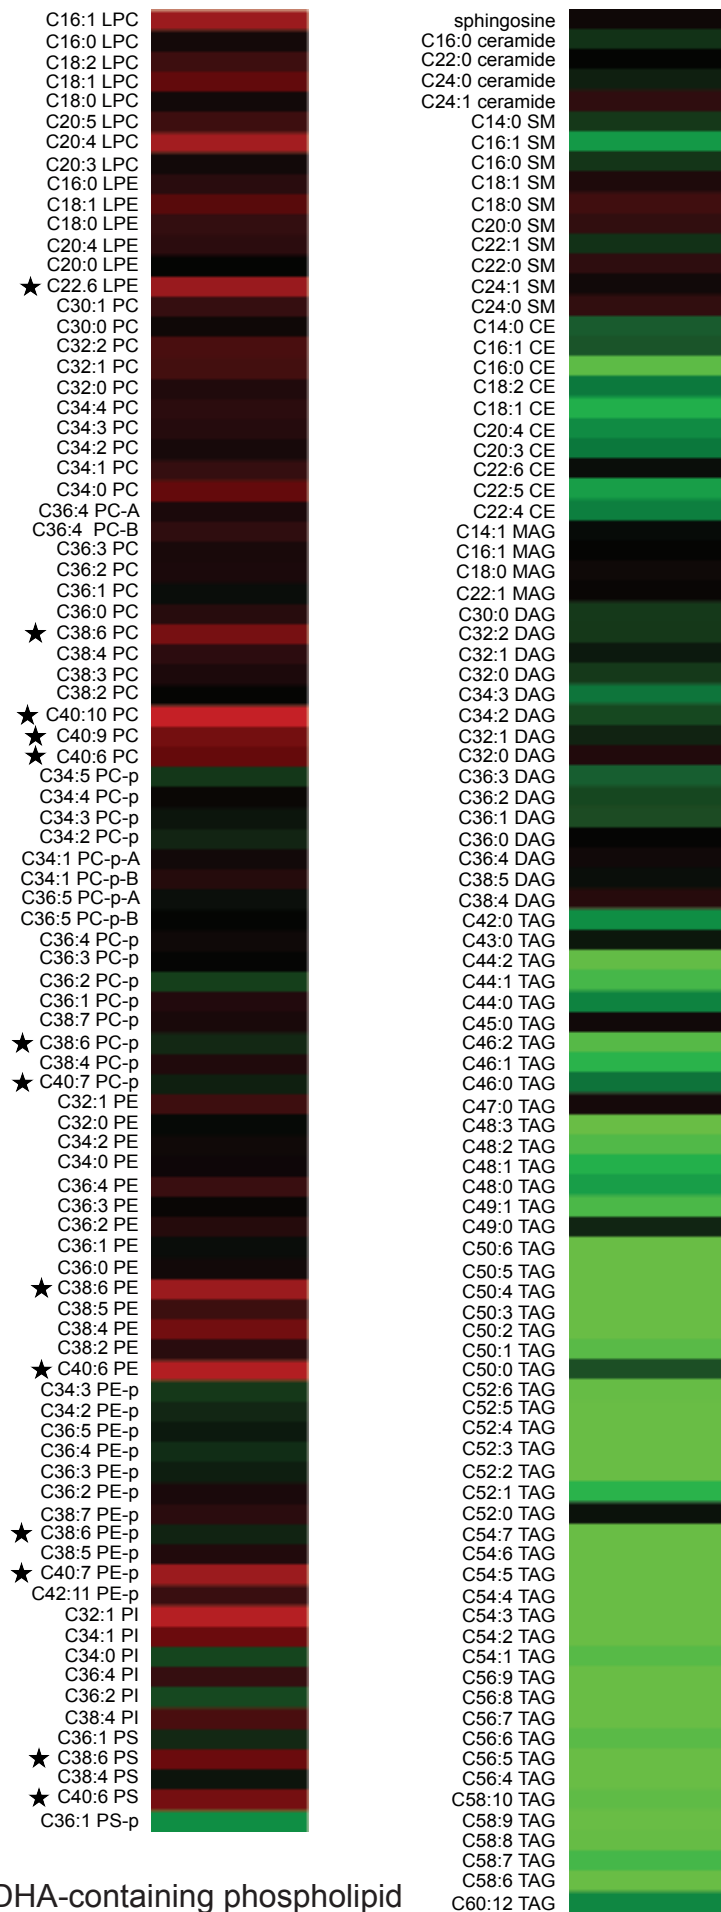

★: DHA-containing phospholipid

**A**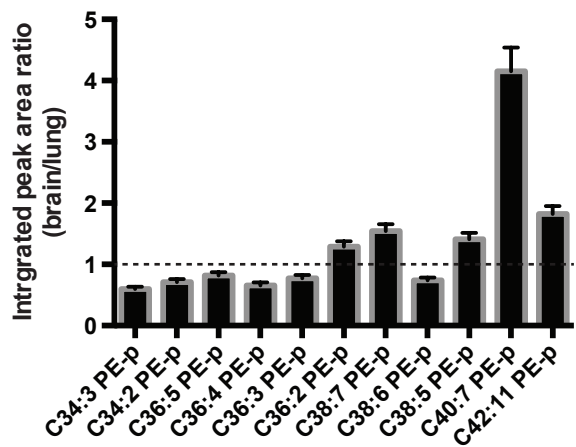**B**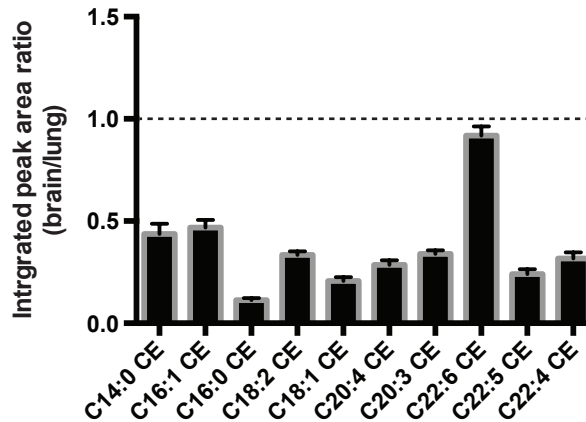**C**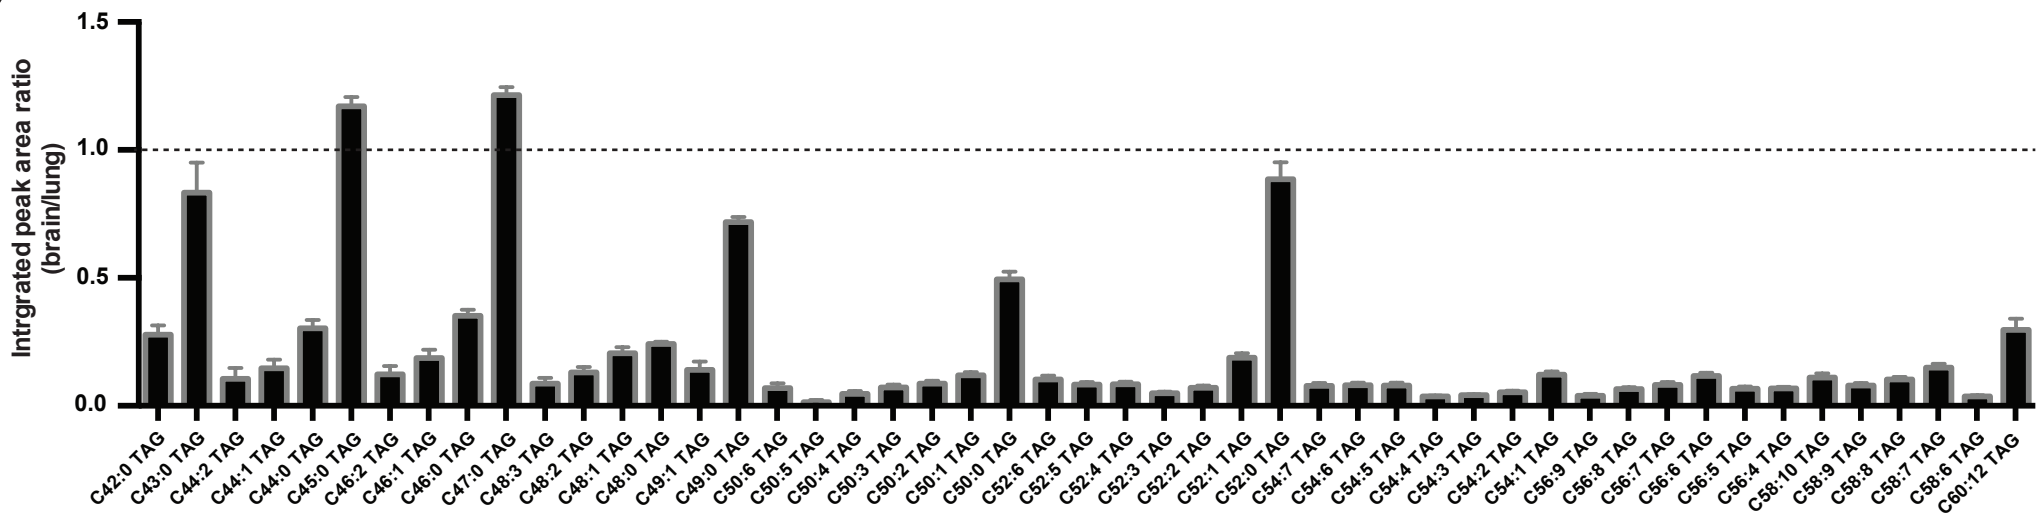**Figure S5**

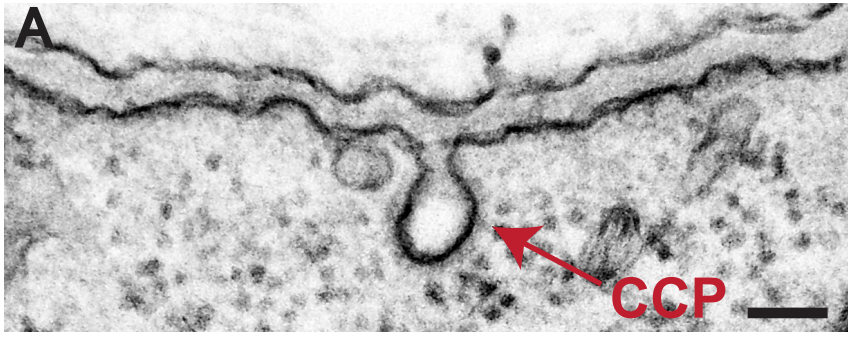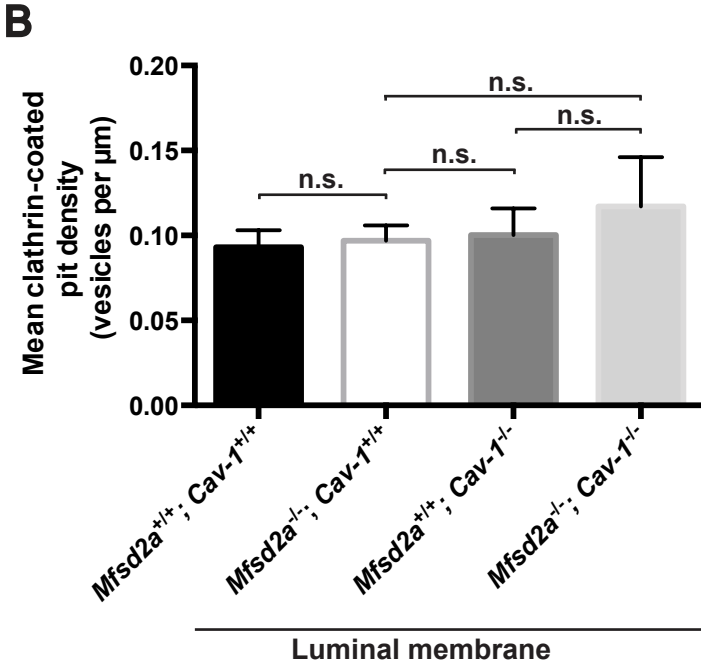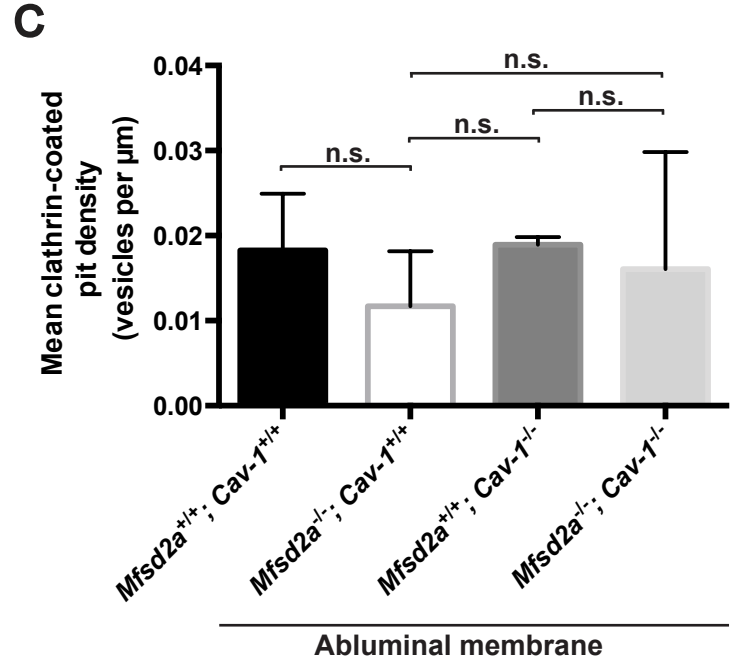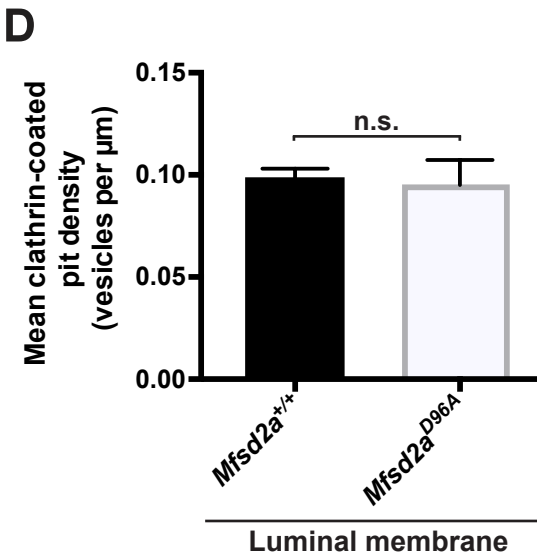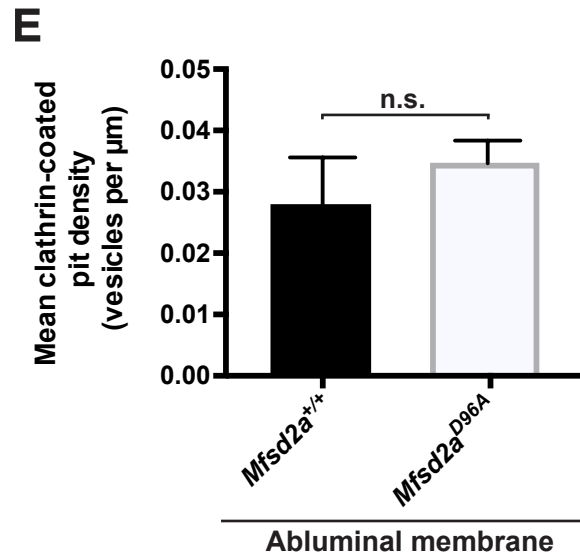

Figure S6



*Cav-1<sup>+/+</sup>*

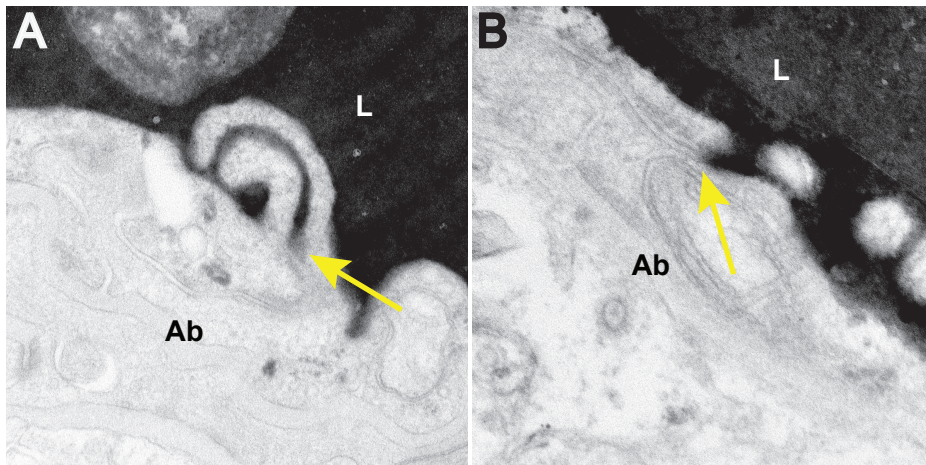

*Cav-1<sup>-/-</sup>*

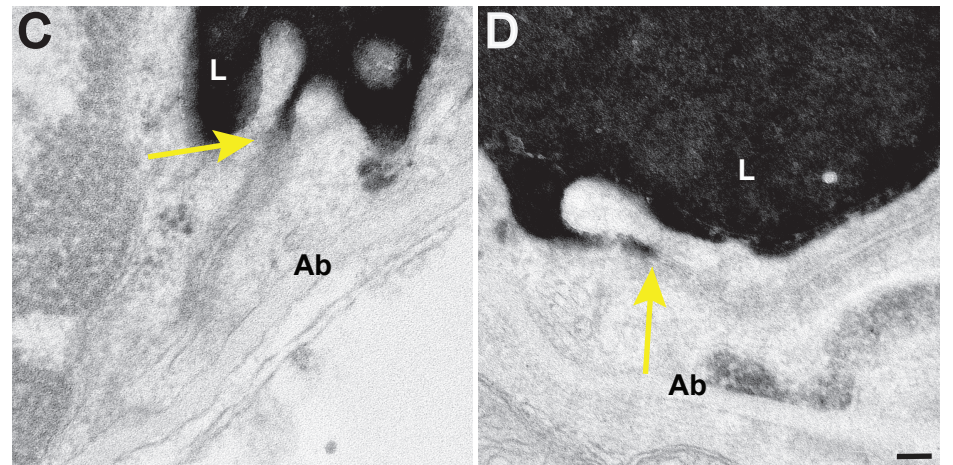

**Figure S7**

**Table S1**

| Metabolite    | <i>Mfds2a</i> <sup>+/+</sup> Average<br>(Integrated Peak<br>Area) | <i>Mfds2a</i> <sup>D96A</sup><br>Average<br>(Integrated Peak<br>Area) | Ratio<br><i>Mfds2a</i> <sup>D96A</sup> : <i>Mfds2a</i> <sup>+/+</sup> | p-value   |
|---------------|-------------------------------------------------------------------|-----------------------------------------------------------------------|-----------------------------------------------------------------------|-----------|
| C14:0 LPC     | 1559496                                                           | 3046444                                                               | 1.95                                                                  | 8.756E-05 |
| C16:1 LPC     | 4252239                                                           | 10056141                                                              | 2.36                                                                  | 1.644E-07 |
| C16:0 LPC     | 42087015                                                          | 87182505                                                              | 2.07                                                                  | 8.515E-05 |
| C18:2 LPC     | 427454                                                            | 1215604                                                               | 2.84                                                                  | 0.0001    |
| C18:1 LPC     | 6187399                                                           | 11368348                                                              | 1.84                                                                  | 2.111E-07 |
| C18:0 LPC     | 14977640                                                          | 33607528                                                              | 2.24                                                                  | 0.0004    |
| C20:5 LPC     | 119254                                                            | 207843                                                                | 1.74                                                                  | 0.0071    |
| C20:3 LPC     | 20321741                                                          | 40620082                                                              | 2.00                                                                  | 0.0001    |
| C22:6 LPC     | 1153049                                                           | 149263                                                                | 0.13                                                                  | 4.547E-05 |
| C16:0 LPE     | 2265887                                                           | 4446666                                                               | 1.96                                                                  | 0.0003    |
| C18:1 LPE     | 934537                                                            | 3187066                                                               | 3.41                                                                  | 6.259E-07 |
| C18:0 LPE     | 4743681                                                           | 12657290                                                              | 2.67                                                                  | 3.071E-05 |
| C20:4 LPE     | 1249279                                                           | 1045681                                                               | 0.84                                                                  | 0.0359    |
| C20:0 LPE     | 27931258                                                          | 28046298                                                              | 1.00                                                                  | 0.8435    |
| C22:6 LPE     | 3009190                                                           | 653912                                                                | 0.22                                                                  | 7.566E-08 |
| C30:1 PC      | 73818365                                                          | 92237435                                                              | 1.25                                                                  | 0.0153    |
| C30:0 PC      | 1230078651                                                        | 907228758                                                             | 0.74                                                                  | 9.317E-05 |
| C32:2 PC      | 254992058                                                         | 494068990                                                             | 1.94                                                                  | 5.656E-09 |
| C32:1 PC      | 3000823942                                                        | 3725038390                                                            | 1.24                                                                  | 5.254E-05 |
| C32:0 PC      | 3442716003                                                        | 2044796301                                                            | 0.59                                                                  | 7.478E-09 |
| C34:4 PC      | 25245719                                                          | 18193882                                                              | 0.72                                                                  | 0.0001    |
| C34:3 PC      | 64300362                                                          | 145254788                                                             | 2.26                                                                  | 3.914E-09 |
| C34:2 PC      | 808115610                                                         | 1160847723                                                            | 1.44                                                                  | 2.997E-07 |
| C34:1 PC      | 4333465246                                                        | 3822126337                                                            | 0.88                                                                  | 0.0001    |
| C34:0 PC      | 532407446                                                         | 261625969                                                             | 0.49                                                                  | 1.469E-07 |
| C36:4 PC-B    | 801646431                                                         | 286908040                                                             | 0.36                                                                  | 4.852E-07 |
| C36:3 PC      | 156443801                                                         | 175312933                                                             | 1.12                                                                  | 0.0615    |
| C36:2 PC      | 556261799                                                         | 750755225                                                             | 1.35                                                                  | 1.997E-05 |
| C36:1 PC      | 547027164                                                         | 547419430                                                             | 1.00                                                                  | 0.9759    |
| C36:0 PC      | 4138838                                                           | 2812945                                                               | 0.68                                                                  | 2.605E-06 |
| C38:6 PC      | 491475841                                                         | 56443724                                                              | 0.11                                                                  | 3.393E-06 |
| C38:4 PC      | 511872806                                                         | 192419142                                                             | 0.38                                                                  | 1.124E-09 |
| C38:3 PC      | 37248063                                                          | 55524451                                                              | 1.49                                                                  | 4.295E-05 |
| C38:2 PC      | 17177409                                                          | 33153444                                                              | 1.93                                                                  | 3.553E-07 |
| C40:10 PC     | 13966079                                                          | 2501377                                                               | 0.18                                                                  | 7.722E-07 |
| C40:9 PC      | 107579685                                                         | 12946028                                                              | 0.12                                                                  | 5.655E-07 |
| C40:6 PC      | 185170888                                                         | 25286613                                                              | 0.14                                                                  | 1.632E-06 |
| C34:5 PC-p    | 332177                                                            | 391995                                                                | 1.18                                                                  | 0.1582    |
| C34:4 PC-p    | 1904900                                                           | 3662084                                                               | 1.92                                                                  | 1.631E-06 |
| C34:3 PC-p    | 10525921                                                          | 8733773                                                               | 0.83                                                                  | 0.0009    |
| C34:2 PC-p    | 3177838                                                           | 6030576                                                               | 1.90                                                                  | 0.0001    |
| C34:1 PC-p -A | 122516521                                                         | 91599159                                                              | 0.75                                                                  | 4.105E-05 |
| C34:1 PC-p -B | 822793                                                            | 495574.2286                                                           | 0.60                                                                  | 1.941E-06 |
| C36:5 PC-p -B | 4807912                                                           | 5065924                                                               | 1.05                                                                  | 0.2977    |
| C36:4 PC-p    | 31516527                                                          | 25968322                                                              | 0.82                                                                  | 0.0003    |
| C36:1 PC-p    | 2680426                                                           | 2910359                                                               | 1.09                                                                  | 0.1829    |
| C38:6 PC-p    | 5943363                                                           | 284871                                                                | 0.05                                                                  | 0.0303    |
| C38:4 PC-p    | 2172152                                                           | 1749591                                                               | 0.81                                                                  | 0.0138    |
| C32:1 PE      | 8803907                                                           | 26019517                                                              | 2.96                                                                  | 3.742E-07 |
| C32:0 PE      | 4804769                                                           | 4727672                                                               | 0.98                                                                  | 0.7759    |
| C34:2 PE      | 18062523                                                          | 70143304                                                              | 3.88                                                                  | 6.204E-07 |
| C34:0 PE      | 44030552                                                          | 29096804                                                              | 0.66                                                                  | 5.193E-06 |
| C36:4 PE      | 87599065                                                          | 84082064                                                              | 0.96                                                                  | 0.4224    |

|             |           |           |       |           |
|-------------|-----------|-----------|-------|-----------|
| C36:3 PE    | 9665857   | 31778107  | 3.29  | 7.825E-08 |
| C36:2 PE    | 34848601  | 96863825  | 2.78  | 6.421E-09 |
| C36:1 PE    | 34134806  | 50027413  | 1.47  | 4.922E-07 |
| C36:0 PE    | 17888202  | 9270952   | 0.52  | 7.903E-07 |
| C38:6 PE    | 271784659 | 44552562  | 0.16  | 1.155E-06 |
| C38:5 PE    | 67699189  | 99853443  | 1.47  | 0.0002    |
| C38:4 PE    | 397298387 | 340843607 | 0.86  | 0.0015    |
| C38:2 PE    | 25882702  | 23720016  | 0.92  | 0.0120    |
| C40:6 PE    | 293102114 | 53937239  | 0.18  | 9.580E-07 |
| C34:3 PE-p  | 2551676   | 22608314  | 8.86  | 1.024E-06 |
| C34:2 PE-p  | 25475888  | 81667144  | 3.21  | 8.405E-08 |
| C36:5 PE-p  | 46891502  | 41130600  | 0.88  | 0.0097    |
| C36:4 PE-p  | 3567798   | 18699008  | 5.24  | 3.567E-07 |
| C36:3 PE-p  | 7717570   | 44173575  | 5.72  | 7.053E-07 |
| C36:2 PE-p  | 6477014   | 26695284  | 4.12  | 7.604E-07 |
| C36:1 PE-p  | 1315463   | 5551408   | 4.22  | 2.810E-06 |
| C38:7 PE-p  | 179954458 | 57607450  | 0.32  | 1.456E-10 |
| C38:6 PE-p  | 26029794  | 48682078  | 1.87  | 0.0002    |
| C38:5 PE-p  | 45349533  | 45296805  | 1.00  | 0.9740    |
| C40:7 PE-p  | 146241617 | 34650609  | 0.24  | 8.083E-08 |
| C42:11 PE-p | 9366396   | 4098394   | 0.44  | 1.745E-06 |
| C32:1 PI    | 3853260   | 1813039   | 0.47  | 2.750E-07 |
| C34:1 PI    | 67528398  | 26737473  | 0.40  | 3.464E-08 |
| C34:0 PI    | 2499614   | 3425595   | 1.37  | 0.0235    |
| C36:4 PI    | 2907327   | 2117484   | 0.73  | 0.0002    |
| C38:4 PI    | 13538544  | 10170610  | 0.75  | 0.0006    |
| C36:1 PS    | 6938482   | 10597772  | 1.53  | 1.118E-06 |
| C38:6 PS    | 8449033   | 4019122   | 0.48  | 1.800E-07 |
| C38:4 PS    | 19772756  | 24431554  | 1.24  | 0.0011    |
| C40:6 PS    | 128490473 | 55023803  | 0.43  | 4.586E-09 |
| sphingosine | 359191    | 694876    | 1.93  | 0.0240    |
| C14:0 SM    | 593028    | 1057588   | 1.78  | 4.062E-05 |
| C16:1 SM    | 1684781   | 2314573   | 1.37  | 0.0027    |
| C16:0 SM    | 43831912  | 52786212  | 1.20  | 0.0128    |
| C18:1 SM    | 24475979  | 26905114  | 1.09  | 0.0674    |
| C18:0 SM    | 180983246 | 190229406 | 1.05  | 0.3547    |
| C20:0 SM    | 9441323   | 9984594   | 1.05  | 0.2661    |
| C22:1 SM    | 1597303   | 2123389   | 1.32  | 0.0004    |
| C22:0 SM    | 7222196   | 7454390   | 1.03  | 0.5349    |
| C24:1 SM    | 19760089  | 24856191  | 1.25  | 0.0011    |
| C24:0 SM    | 4927540   | 4938167   | 1.00  | 0.9690    |
| C16:1 CE    | 309778    | 1123250   | 3.62  | 0.0012    |
| C16:0 CE    | 194289    | 586732    | 3.01  | 0.0008    |
| C18:2 CE    | 762391    | 1383177   | 1.81  | 0.0020    |
| C18:1 CE    | 484470    | 1902412   | 3.92  | 0.0014    |
| C20:4 CE    | 1120375   | 1306620   | 1.16  | 0.2274    |
| C20:3 CE    | 74025     | 561756    | 7.58  | 0.0024    |
| C22:6 CE    | 1032170   | 537918    | 0.521 | 8.852E-05 |

**Table S2**

| <b>Metabolite</b> | <b><i>Mfds2a</i><sup>+/+</sup><br/>Average<br/>(Integrated Peak<br/>Area)</b> | <b><i>Mfds2a</i><sup>-/-</sup><br/>Average<br/>(Integrated Peak<br/>Area)</b> | <b>Ratio<br/><i>Mfds2a</i><sup>-/-</sup> : <i>Mfds2a</i><sup>+/+</sup></b> | <b>p-value</b> |
|-------------------|-------------------------------------------------------------------------------|-------------------------------------------------------------------------------|----------------------------------------------------------------------------|----------------|
| C14:0 LPC         | 1330224                                                                       | 2197052                                                                       | 1.65                                                                       | 0.1627         |
| C16:1 LPC         | 3220138                                                                       | 6365818                                                                       | 1.98                                                                       | 0.0730         |
| C16:0 LPC         | 26145477                                                                      | 43343885                                                                      | 1.66                                                                       | 0.0897         |
| C18:2 LPC         | 425827                                                                        | 880596                                                                        | 2.07                                                                       | 0.0748         |
| C18:1 LPC         | 3960594                                                                       | 7476430                                                                       | 1.89                                                                       | 0.0783         |
| C18:0 LPC         | 8812369                                                                       | 18102666                                                                      | 2.05                                                                       | 0.0507         |
| C20:4 LPC         | 2130379                                                                       | 756938                                                                        | 0.36                                                                       | 0.0247         |
| C20:3 LPC         | 10633863                                                                      | 17451766                                                                      | 1.64                                                                       | 0.0896         |
| C16:0 LPE         | 1201757                                                                       | 2037139                                                                       | 1.70                                                                       | 0.1185         |
| C18:1 LPE         | 603083                                                                        | 1831537                                                                       | 3.04                                                                       | 0.0371         |
| C18:0 LPE         | 3267983                                                                       | 7004364                                                                       | 2.14                                                                       | 0.0683         |
| C20:4 LPE         | 1370877                                                                       | 1073367                                                                       | 0.78                                                                       | 0.3590         |
| C22:6 LPE         | 804230                                                                        | 102272                                                                        | 0.13                                                                       | 0.0031         |
| C30:1 PC          | 90265643                                                                      | 143408710                                                                     | 1.59                                                                       | 0.2170         |
| C30:0 PC          | 936244276                                                                     | 592579118                                                                     | 0.63                                                                       | 0.1027         |
| C32:2 PC          | 104592527                                                                     | 212361050                                                                     | 2.03                                                                       | 0.0830         |
| C32:1 PC          | 1911275661                                                                    | 2158082262                                                                    | 1.13                                                                       | 0.6311         |
| C32:0 PC          | 2658033945                                                                    | 1392367536                                                                    | 0.52                                                                       | 0.0390         |
| C34:4 PC          | 27374232                                                                      | 13477390                                                                      | 0.49                                                                       | 0.0429         |
| C34:3 PC          | 55366198                                                                      | 88447735                                                                      | 1.60                                                                       | 0.2077         |
| C34:2 PC          | 517305774                                                                     | 679238748                                                                     | 1.31                                                                       | 0.3559         |
| C34:1 PC          | 3359088690                                                                    | 2760004311                                                                    | 0.82                                                                       | 0.3908         |
| C34:0 PC          | 299918206                                                                     | 132498362                                                                     | 0.44                                                                       | 0.0328         |
| C36:4 PC-B        | 656974220                                                                     | 233634591                                                                     | 0.36                                                                       | 0.0152         |
| C36:3 PC          | 97795329                                                                      | 119219631                                                                     | 1.22                                                                       | 0.4864         |
| C36:2 PC          | 300553113                                                                     | 400141984                                                                     | 1.33                                                                       | 0.3392         |
| C36:1 PC          | 327027807                                                                     | 288625366                                                                     | 0.88                                                                       | 0.6204         |
| C36:0 PC          | 1902725                                                                       | 1397648                                                                       | 0.73                                                                       | 0.2317         |
| C38:6 PC          | 103893605                                                                     | 11023354                                                                      | 0.11                                                                       | 2.779E-05      |
| C38:4 PC          | 380232424                                                                     | 132337164                                                                     | 0.35                                                                       | 0.0166         |
| C38:3 PC          | 15418718                                                                      | 39800444                                                                      | 2.58                                                                       | 0.0562         |
| C38:2 PC          | 7072704                                                                       | 14829304                                                                      | 2.10                                                                       | 0.0784         |
| C40:10 PC         | 3916461                                                                       | 360331                                                                        | 0.09                                                                       | 0.0173         |
| C40:9 PC          | 32662360                                                                      | 3730219                                                                       | 0.11                                                                       | 1.709E-05      |
| C40:6 PC          | 55896708                                                                      | 5060988                                                                       | 0.09                                                                       | 0.0030         |
| C34:4 PC-p        | 2407789                                                                       | 3130122                                                                       | 1.30                                                                       | 0.3655         |
| C34:2 PC-p        | 2086377                                                                       | 2899887                                                                       | 1.39                                                                       | 0.2593         |
| C34:1 PC-p -A     | 73855715                                                                      | 49800593                                                                      | 0.67                                                                       | 0.1543         |
| C34:1 PC-p -B     | 302430                                                                        | 238548                                                                        | 0.79                                                                       | 0.0777         |
| C36:5 PC-p -B     | 5552270                                                                       | 4483570                                                                       | 0.81                                                                       | 0.3116         |
| C36:4 PC-p        | 20968745                                                                      | 15573031                                                                      | 0.74                                                                       | 0.2597         |
| C36:2 PC-p        | 2075744                                                                       | 3436249                                                                       | 1.66                                                                       | 0.1405         |
| C36:1 PC-p        | 1075310                                                                       | 1580765                                                                       | 1.47                                                                       | 0.2374         |
| C38:4 PC-p        | 2855268                                                                       | 1096024                                                                       | 0.38                                                                       | 0.0656         |
| C32:1 PE          | 5994315                                                                       | 13287823                                                                      | 2.22                                                                       | 0.0689         |
| C32:0 PE          | 2743484                                                                       | 2410381                                                                       | 0.88                                                                       | 0.6550         |
| C34:2 PE          | 12171881                                                                      | 40875031                                                                      | 3.36                                                                       | 0.0330         |
| C34:0 PE          | 22145861                                                                      | 14772509                                                                      | 0.67                                                                       | 0.1219         |
| C36:4 PE          | 68042811                                                                      | 61300894                                                                      | 0.90                                                                       | 0.6587         |
| C36:3 PE          | 5895146                                                                       | 19241259                                                                      | 3.26                                                                       | 0.0321         |
| C36:2 PE          | 20322779                                                                      | 55483850                                                                      | 2.73                                                                       | 0.0391         |
| C36:1 PE          | 25891112                                                                      | 32412583                                                                      | 1.25                                                                       | 0.3967         |
| C36:0 PE          | 7823210                                                                       | 4105286                                                                       | 0.52                                                                       | 0.0610         |



|             |           |           |      |           |
|-------------|-----------|-----------|------|-----------|
| C38:6 PE    | 74736975  | 8820310   | 0.12 | 4.579E-06 |
| C38:5 PE    | 43600839  | 64095330  | 1.47 | 0.1683    |
| C38:4 PE    | 337152853 | 259117462 | 0.77 | 0.2515    |
| C38:2 PE    | 12213932  | 10943860  | 0.90 | 0.7401    |
| C40:6 PE    | 100291909 | 16062575  | 0.16 | 2.428E-05 |
| C34:3 PE-p  | 2122354   | 14190828  | 6.69 | 0.0222    |
| C34:2 PE-p  | 16680510  | 45429553  | 2.72 | 0.0342    |
| C36:5 PE-p  | 50061359  | 39407443  | 0.79 | 0.2899    |
| C36:4 PE-p  | 1768857   | 11443879  | 6.47 | 0.0205    |
| C36:3 PE-p  | 3280143   | 23799411  | 7.26 | 0.0210    |
| C36:2 PE-p  | 3009206   | 14581331  | 4.85 | 0.0206    |
| C38:7 PE-p  | 55928379  | 9849964   | 0.18 | 0.0001    |
| C38:6 PE-p  | 69059242  | 24522519  | 0.36 | 0.0692    |
| C38:5 PE-p  | 38491795  | 26204547  | 0.68 | 0.1346    |
| C40:7 PE-p  | 45364711  | 6182461   | 0.14 | 0.0003    |
| C42:11 PE-p | 2015869   | 593372    | 0.29 | 0.0021    |
| C34:0 PI    | 22423018  | 7251128   | 0.32 | 0.0407    |
| C36:4 PI    | 2385308   | 1512576   | 0.63 | 0.0640    |
| C38:4 PI    | 15271396  | 9229568   | 0.60 | 0.0429    |
| C36:1 PS    | 4321635   | 6646849   | 1.54 | 0.1495    |
| C38:6 PS    | 3086186   | 2504173   | 0.81 | 0.2215    |
| C38:4 PS    | 21194588  | 26018000  | 1.23 | 0.3402    |
| C40:6 PS    | 37747957  | 10428366  | 0.28 | 0.0002    |
| sphingosine | 628998    | 715210    | 1.13 | 0.2480    |
| C14:0 SM    | 263664    | 421698    | 1.59 | 0.2207    |
| C16:1 SM    | 688187    | 742066    | 1.07 | 0.7613    |
| C16:0 SM    | 23280304  | 25496216  | 1.09 | 0.6978    |
| C18:1 SM    | 6926436   | 8195561   | 1.18 | 0.4917    |
| C18:0 SM    | 68601927  | 72446204  | 1.05 | 0.8386    |
| C20:0 SM    | 4190083   | 4176841   | 0.99 | 0.9916    |
| C22:1 SM    | 484354    | 616350    | 1.27 | 0.4250    |
| C22:0 SM    | 3221079   | 3245144   | 1.00 | 0.9761    |
| C24:1 SM    | 6516459   | 8286961   | 1.27 | 0.3463    |
| C24:0 SM    | 2312151   | 2177290   | 0.94 | 0.7789    |
| C18:2 CE    | 161790    | 186657    | 1.15 | 0.5763    |
| C20:5 CE    | 313142    | 199849    | 0.63 | 0.3034    |
| C20:4 CE    | 378373    | 249975    | 0.66 | 0.1848    |

**Table S4**

**A**

| <b>Density of vesicular pits <i>in vitro</i>, Related to Figure 1</b> |                           |                             |                               |     |     |                                         |
|-----------------------------------------------------------------------|---------------------------|-----------------------------|-------------------------------|-----|-----|-----------------------------------------|
| <b>Cell Source</b>                                                    | <b>No. of experiments</b> | <b>No. of cell profiles</b> | <b>No. of pits/experiment</b> |     |     | <b>Mean vesicular pit density (/μm)</b> |
| bEnd.3 – mock infected                                                | 3                         | 75 (25/experiment)          | 178                           | 172 | 184 | 1.47 ± 0.24                             |
| bEnd.3 – Mfsd2a infected                                              |                           | 75 (25/experiment)          | 99                            | 76  | 63  | 0.64 ± 0.09                             |
| PANC-1 – GFP stably transfected                                       | 3                         | 75 (25/experiment)          | 80                            | 120 | 83  | 0.79 ± 0.01                             |
| PANC-1 – MFSD2A-GFP stably transfected                                |                           | 75 (25/experiment)          | 46                            | 40  | 57  | 0.41 ± 0.05                             |

**B**

| <b>Density of total membrane-connected vesicles in brain endothelial cells (P4), Related to Figure 3</b> |                       |                                          |                               |     |     |                                             |                                               |
|----------------------------------------------------------------------------------------------------------|-----------------------|------------------------------------------|-------------------------------|-----|-----|---------------------------------------------|-----------------------------------------------|
| <b>Genotype</b>                                                                                          | <b>No. of animals</b> | <b>No. of endothelial cross-sections</b> | <b>No. of vesicles/animal</b> |     |     | <b>Luminal mean vesicular density (/μm)</b> | <b>Abluminal mean vesicular density (/μm)</b> |
| <i>Mfsd2a</i> <sup>+/+</sup>                                                                             | 3                     | 60 (20/animal)                           | 81                            | 63  | 78  | 0.33 ± 0.01                                 | 0.32 ± 0.01                                   |
| <i>Mfsd2a</i> <sup>D96.1</sup>                                                                           | 3                     | 60 (20/animal)                           | 163                           | 159 | 157 | 0.85 ± 0.03                                 | 0.79 ± 0.08                                   |

**C**

| <b>Density of Cav-1-positive vesicles in brain endothelial cells (P90), Related to Figure 5</b> |                       |                                          |                                              |    |    |                                                 |
|-------------------------------------------------------------------------------------------------|-----------------------|------------------------------------------|----------------------------------------------|----|----|-------------------------------------------------|
| <b>Genotype</b>                                                                                 | <b>No. of animals</b> | <b>No. of endothelial cross-sections</b> | <b>No. of Cav-1 positive vesicles/animal</b> |    |    | <b>Mean vesicular density (/μm<sup>2</sup>)</b> |
| <i>Mfsd2a</i> <sup>+/+</sup>                                                                    | 3                     | 30 (10/animal)                           | 14                                           | 14 | 12 | 2.01 ± 0.14                                     |
| <i>Mfsd2a</i> <sup>-/-</sup>                                                                    | 3                     | 30 (10/animal)                           | 27                                           | 29 | 32 | 4.55 ± 0.81                                     |

## D

| Density of total membrane-connected vesicles in brain endothelial cells (P5), Related to Figure 6 |                |                                   |                        |     |     |     |                                                  |                                                    |
|---------------------------------------------------------------------------------------------------|----------------|-----------------------------------|------------------------|-----|-----|-----|--------------------------------------------------|----------------------------------------------------|
| Genotype                                                                                          | No. of animals | No. of endothelial cross-sections | No. of vesicles/animal |     |     |     | Luminal mean vesicular density ( $\mu\text{m}$ ) | Abluminal mean vesicular density ( $\mu\text{m}$ ) |
| <i>Mfsd2a</i> <sup>+/+</sup> ; <i>Cav-1</i> <sup>+/+</sup>                                        | 4              | 80 (20/animal)                    | 81                     | 83  | 74  | 81  | 0.34 ± 0.01                                      | 0.28 ± 0.02                                        |
| <i>Mfsd2a</i> <sup>-/-</sup> ; <i>Cav-1</i> <sup>+/+</sup>                                        | 4              | 80 (20/animal)                    | 175                    | 215 | 244 | 199 | 0.86 ± 0.08                                      | 0.86 ± 0.09                                        |
| <i>Mfsd2a</i> <sup>+/+</sup> ; <i>Cav-1</i> <sup>-/-</sup>                                        | 4              | 80 (20/animal)                    | 42                     | 35  | 49  | 35  | 0.17 ± 0.02                                      | 0.10 ± 0.01                                        |
| <i>Mfsd2a</i> <sup>-/-</sup> ; <i>Cav-1</i> <sup>-/-</sup>                                        | 4              | 80 (20/animal)                    | 31                     | 57  | 45  | 32  | 0.20 ± 0.03                                      | 0.09 ± 0.01                                        |

## E

| Density of clathrin-coated pits in brain endothelial cells (P5), Related to Figure S6 |                |                                   |                        |    |    |    |                                                  |                                                    |
|---------------------------------------------------------------------------------------|----------------|-----------------------------------|------------------------|----|----|----|--------------------------------------------------|----------------------------------------------------|
| Genotype                                                                              | No. of animals | No. of endothelial cross-sections | No. of vesicles/animal |    |    |    | Luminal mean vesicular density ( $\mu\text{m}$ ) | Abluminal mean vesicular density ( $\mu\text{m}$ ) |
| <i>Mfsd2a</i> <sup>+/+</sup> ; <i>Cav-1</i> <sup>+/+</sup>                            | 4              | 80 (20/animal)                    | 15                     | 16 | 9  | 17 | 0.093 ± 0.01                                     | 0.017 ± 0.01                                       |
| <i>Mfsd2a</i> <sup>-/-</sup> ; <i>Cav-1</i> <sup>+/+</sup>                            | 4              | 80 (20/animal)                    | 14                     | 11 | 12 | 17 | 0.096 ± 0.01                                     | 0.011 ± 0.01                                       |
| <i>Mfsd2a</i> <sup>+/+</sup> ; <i>Cav-1</i> <sup>-/-</sup>                            | 4              | 80 (20/animal)                    | 20                     | 18 | 21 | 11 | 0.10 ± 0.02                                      | 0.018 ± 0.001                                      |
| <i>Mfsd2a</i> <sup>-/-</sup> ; <i>Cav-1</i> <sup>-/-</sup>                            | 4              | 80 (20/animal)                    | 9                      | 38 | 22 | 11 | 0.12 ± 0.03                                      | 0.016 ± 0.014                                      |

## F

| Density of clathrin-coated pits in brain endothelial cells (P4), Related to Figure S6 |                |                                   |                        |    |    |                                                  |                                                    |  |
|---------------------------------------------------------------------------------------|----------------|-----------------------------------|------------------------|----|----|--------------------------------------------------|----------------------------------------------------|--|
| Genotype                                                                              | No. of animals | No. of endothelial cross-sections | No. of vesicles/animal |    |    | Luminal mean vesicular density ( $\mu\text{m}$ ) | Abluminal mean vesicular density ( $\mu\text{m}$ ) |  |
| <i>Mfsd2a</i> <sup>+/+</sup>                                                          | 3              | 60 (20/animal)                    | 16                     | 15 | 13 | 0.098 ± 0.004                                    | 0.027 ± 0.007                                      |  |
| <i>Mfsd2a</i> <sup>D96A</sup>                                                         | 3              | 60 (20/animal)                    | 13                     | 11 | 11 | 0.095 ± 0.02                                     | 0.034 ± 0.003                                      |  |

## Supplemental Figure Legends

### **Figure S1. Validation of the transporter-dead *Mfsd2a*<sup>D96A</sup> mutant mice. Related to Figure 2.**

(A) PCR screening of *Mfsd2a*<sup>D96A</sup> mice. A 250bp region spanning *Mfsd2a* exon 3 is amplified. Two additional silent mutations in codons 97/98 generate a SpeI restriction site, resulting in 100bp and 150bp fragments after digestion. Thus, *Mfsd2a*<sup>+/+</sup> mice produce one PCR fragment, with *Mfsd2a*<sup>D96A/+</sup> and *Mfsd2a*<sup>D96A/D96A</sup> mice producing three and two fragments, respectively. (B-C) Sanger sequencing of the D96A region in *Mfsd2a*<sup>+/+</sup> littermate controls (B) and *Mfsd2a*<sup>D96A</sup> mutants (C). The purple and orange-boxed regions represent the D96A point mutation and new SpeI site, respectively. (D-E) Immunostaining at P4 of Mfsd2a protein (green) reveals vascular expression (purple, PECAM) in the cerebellum of both *Mfsd2a*<sup>+/+</sup> control (D) and *Mfsd2a*<sup>D96A</sup> mutants (E). *n* = 3 animals per genotype. Scale bar, 100  $\mu$ m. (F-G) Immunostaining at P4 reveals absence of Mfsd2a protein expression in non-BBB-containing liver vasculature (purple, PECAM) of both *Mfsd2a*<sup>+/+</sup> control (F) and *Mfsd2a*<sup>D96A</sup> mutants (G). *n* = 3 animals per genotype. Scale bar, 100  $\mu$ m.

### **Figure S2. Comprehensive lipidomic profiling of *Mfsd2a*<sup>D96A</sup> and *Mfsd2a*<sup>-/-</sup> mutant brains. Related to Figure 2.**

(A) Heatmap representation of the *Mfsd2a*<sup>D96A</sup>-to-*Mfsd2a*<sup>+/+</sup> log-ratio of integrated mass spectrometry peak area for each phospholipid species analyzed. Brains were harvested from mutants and wild-type littermate controls at P4. *n* = 6 animals per genotype. (B) Heatmap representation of the *Mfsd2a*<sup>-/-</sup>-to-*Mfsd2a*<sup>+/+</sup> log-ratio of integrated mass spectrometry peak area for each phospholipid species analyzed. Brains were harvested from mutants and wild-type littermate controls at P4. *n* = 4 animals per genotype. For all data, each species value is normalized to internal standard. (LPC, lyso-phosphatidylcholine; PC, phosphatidylcholine; LPE, lyso-phosphatidylethanolamine; PE, phosphatidylethanolamine; PS, phosphatidylserine; PI, phosphatidylinositol; p, plasmalogen).



**Figure S3. *Mfsd2a*<sup>-/-</sup> and *Mfsd2a*<sup>D96A</sup> mice display BBB leakage at adult stages and genetic inhibition of the caveolae pathway rescues BBB leakage defects in *Mfsd2a*<sup>-/-</sup> animals. Related to Figures 3 and 6.**

(A-B) HRP tracer (dark brown) was injected into the circulation of *Mfsd2a*<sup>+/+</sup> (A) and *Mfsd2a*<sup>D96A</sup> (B) mice at P90. Tracer diffuses into the forebrain parenchyma in *Mfsd2a*<sup>D96A</sup> mutants (B), whereas tracer is confined to the vasculature in *Mfsd2a*<sup>+/+</sup> mice (A). *n* = 3 animals per genotype. Scale bar, 100 μm. (C-F) HRP tracer (dark brown) was injected into the circulation of *Mfsd2a*<sup>+/+</sup>; *Cav-1*<sup>+/+</sup> (C), *Mfsd2a*<sup>-/-</sup>; *Cav-1*<sup>+/+</sup> (D), *Mfsd2a*<sup>+/+</sup>; *Cav-1*<sup>-/-</sup> (E), and *Mfsd2a*<sup>-/-</sup>; *Cav-1*<sup>-/-</sup> (F) mice at P90. Tracer diffuses into the forebrain parenchyma in *Mfsd2a*<sup>-/-</sup>; *Cav-1*<sup>+/+</sup> single mutants (D), whereas tracer is confined to the vasculature in all other tested genotypes (C, E, and F). *n* = 4 animals per genotype. Scale bar, 100 μm.

**Figure S4. Comprehensive lipidomic profiling of brain versus lung capillaries.**

**Related to Figure 4.**

(A) Western blot of NeuN (neuronal marker), VE-cadherin (endothelial cell marker), and β-Actin (loading control) proteins in acutely isolated capillaries from brains of P4 wild-type mice. Capillary lysates are free of neuronal contamination. (B) Western blot of VE-cadherin (endothelial cell marker), Pdgfr-β (pericyte marker), Aquaporin-4 (Aqp4, astrocyte endfeet marker), and β -Actin (loading control) proteins in acutely isolated capillaries and total tissue lysates from brains and lungs of wild-type mice. Both brain and lung capillary lysates are enriched in endothelial cells compared to total tissue lysates, and brain capillary lysates are free of astrocyte contamination. (C) Heatmap representation of the brain-to-lung log-ratio of integrated mass spectrometry peak area for each lipid species analyzed. Organs were harvested from wild-type mice at P4. Each species value is normalized to internal standard. (LPC, lyso-phosphatidylcholine; PC, phosphatidylcholine; LPE, lyso-phosphatidylethanolamine; PE, phosphatidylethanolamine; PS, phosphatidylserine; PI, phosphatidylinositol; p, plasmalogen; SM, sphingomyelin; CE, cholesteryl ester; MAG, monoacylglycerol; DAG, diacylglycerol; TAG, triacylglycerol). *n* = 6 groups per organ, 8 animals pooled per group.

**Figure S5. Examples of lipid populations with higher levels in lung capillaries versus brain capillaries. Related to Figure 4.**

(A) Lipidomic analysis of ethanolamine plasmalogen (PE-p) species from brain versus lung capillaries of P4 wild-type mice. (B) Lipidomic analysis of cholesteryl ester (CE) species from brain versus lung capillaries of P4 wild-type mice. (C) Lipidomic analysis of triacylglycerol (TAG) species from brain versus lung capillaries of P4 wild-type mice. For all data, value for each species is normalized to internal standard and expressed as brain-to-lung ratio of integrated mass spectrometry peak area. Data are mean  $\pm$  s.e.m. For all data,  $n = 6$  groups per organ, 8 animals pooled per group.

**Figure S6. Clathrin-mediated pathway is not required for Mfsd2a regulation of BBB permeability. Related to Figures 3 and 6; Table S4.**

(A) Example image of a clathrin-coated pit (CCP, red arrow) in CNS endothelial cells under electron microscopy. Scale bar, 100 nm. (B-C) Quantification shows no significant changes in clathrin-coated pit density along the luminal (B) or abluminal (C) plasma membrane in *Mfsd2a*<sup>+/+</sup>; *Cav-1*<sup>+/+</sup>, *Mfsd2a*<sup>-/-</sup>; *Cav-1*<sup>+/+</sup>, *Mfsd2a*<sup>+/+</sup>; *Cav-1*<sup>-/-</sup>, and *Mfsd2a*<sup>-/-</sup>; *Cav-1*<sup>-/-</sup> mice at P5.  $n = 4$  animals per genotype, 20 capillary cross-sections per animal. (D-E) Quantification shows no significant changes in clathrin-coated pit density along the luminal (D) or abluminal (E) plasma membrane in *Mfsd2a*<sup>+/+</sup> and *Mfsd2a*<sup>D96A</sup> mice at P4.  $n = 3$  animals per genotype, 20 capillary cross-sections per animal. All data are mean  $\pm$  s.e.m.; n.s., not significant.

**Figure S7. Tight junctions are functional in CNS endothelial cells of *Cav-1*<sup>-/-</sup> mice. Related to Figure 6.**

HRP tracer (black) fills the CNS vessel lumen (L) and enters intercellular clefts but is sharply halted at tight junction “kissing points” (yellow arrows) in both *Cav-1*<sup>-/-</sup> mutants (C-D) and *Cav-1*<sup>+/+</sup> littermate control animals (A-B) at P90.  $n = 3$  animals per genotype. Scale bar, 100 nm.

**Table S1. Lipidomic profiling of *Mfsd2a*<sup>D96A</sup> mutant brains. Related to Figure 2.**

Complete lipidomic analysis of phospholipid species from brain lysate of P4 *Mfsd2a*<sup>D96A</sup> mutant and *Mfsd2a*<sup>+/+</sup> littermates (LPC, lyso-phosphatidylcholine; PC, phosphatidylcholine; LPE, lyso-phosphatidylethanolamine; PE, phosphatidylethanolamine; PS, phosphatidylserine; PI, phosphatidylinositol; p, plasmalogen; SM, sphingomyelin). Value for each species is normalized to internal standard and expressed as integrated mass spectrometry peak area. *n* = 6 animals per genotype.

**Table S2. Lipidomic profiling of *Mfsd2a*<sup>-/-</sup> mutant brains. Related to Figure 2.**

Complete lipidomic analysis of phospholipid species from brain lysate of P4 *Mfsd2a*<sup>-/-</sup> mutant and *Mfsd2a*<sup>+/+</sup> mice (LPC, lyso-phosphatidylcholine; PC, phosphatidylcholine; LPE, lyso-phosphatidylethanolamine; PE, phosphatidylethanolamine; PS, phosphatidylserine; PI, phosphatidylinositol; p, plasmalogen). Value for each species is normalized to internal standard and expressed as integrated mass spectrometry peak area. *n* = 4 animals per genotype.

**Table S4. Quantification of EM images across multiple paradigms. Related to Figures 1, 3, 5, 6, and S5.**

Raw quantification values of mean vesicular pit/vesicular density from all *in vitro* and *in vivo* experiments relating to *Mfsd2a* function. Density values were calculated from the number of vesicles per  $\mu\text{m}$  of membrane for each image collected. All images were collected at 12000x magnification. Density values for each cell source/genotype reflect the average of mean density values obtained from each individual experiment/animal and are expressed as mean  $\pm$  s.e.m.

**Data S1. Custom ImageJ macro for quantifying BBB tracer permeability assays. Related to STAR Methods.**

```
//this macro quantifies the area of blood vessels and area of tracer in images from coronal forebrain sections after BBB tracer permeability assays
```

```
//initialize ImageJ  
run("Colors...", "foreground=white background=black selection=yellow");  
run("Options...", "iterations=1 count=1 black edm=Overwrite");
```

```

//choose folder with raw images and create folder to save processed images
rawdir=getDirectory("Choose Raw Data Folder");
resultdir=getDirectory("Choose Result Data Folder");
run("Set Measurements...", "area limit display redirect=None decimal=3");

//batch process raw images
var f;

list=getFileList(rawdir);
for(f=0;f<list.length;f++)
{
    open(rawdir+list[f]);
    process();
}

//measure area of vessels (C1) and tracer (C2)
function process()
{
    //max z project
    //split channels and rename
    //run("Stack to Images");
    run("Z Project...", "projection=[Max Intensity]");
    run("Split Channels");
    //measure area of vessels
    selectWindow("C1-MAX_"+list[f]);run("Subtract Background...",
"rolling=70");setAutoThreshold("Huang dark");setOption("BlackBackground",
true);run("Convert to Mask");saveAs("Tiff",
resultdir+list[f]+"_vessels_Mask.tif");run("Analyze Particles...", "size=10-Infinity
display exclude summarize add");//saveAs("Tiff", resultdir+list[f]+"_vessels_Mask.tif");
    //measure area of tracer
    selectWindow("C2-MAX_"+list[f]);run("Subtract Background...",
"rolling=70");setAutoThreshold("Huang dark");setOption("BlackBackground",
true);run("Convert to Mask");saveAs("Tiff",
resultdir+list[f]+"_tracer_Mask.tif");run("Analyze Particles...", "size=10-Infinity display
exclude summarize add");//saveAs("Tiff", resultdir+list[f]+"_tracer_Mask.tif");

//save output as an Excel file
selectWindow("Summary");
saveAs("Text", resultdir+"Summary.xls");
run("Close All");
}

```
